# Supplementary material for: Efficient circular RNA engineering by end-to-end self-targeting and splicing reaction using Tetrahymena group I intron ribozyme
Source: PubMed Central journal article supplement — Mol Ther Nucleic Acids. 2023 Aug 1;33:587–98. doi: 10.1016/j.omtn.2023.07.034 (PMC10457212; doi:10.1016/j.omtn.2023.07.034), 2023-08-01
Supplement: mmc1.pdf [file mmc1.pdf]

OMTN, Volume 33

## Supplemental information

**Efficient circular RNA engineering by end-to-end  
self-targeting and splicing reaction  
using *Tetrahymena* group I intron ribozyme**

**Kyung Hyun Lee, Seongcheol Kim, Jaehwi Song, Seung Ryul Han, Ji Hyun Kim, and Seong-  
Wook Lee**

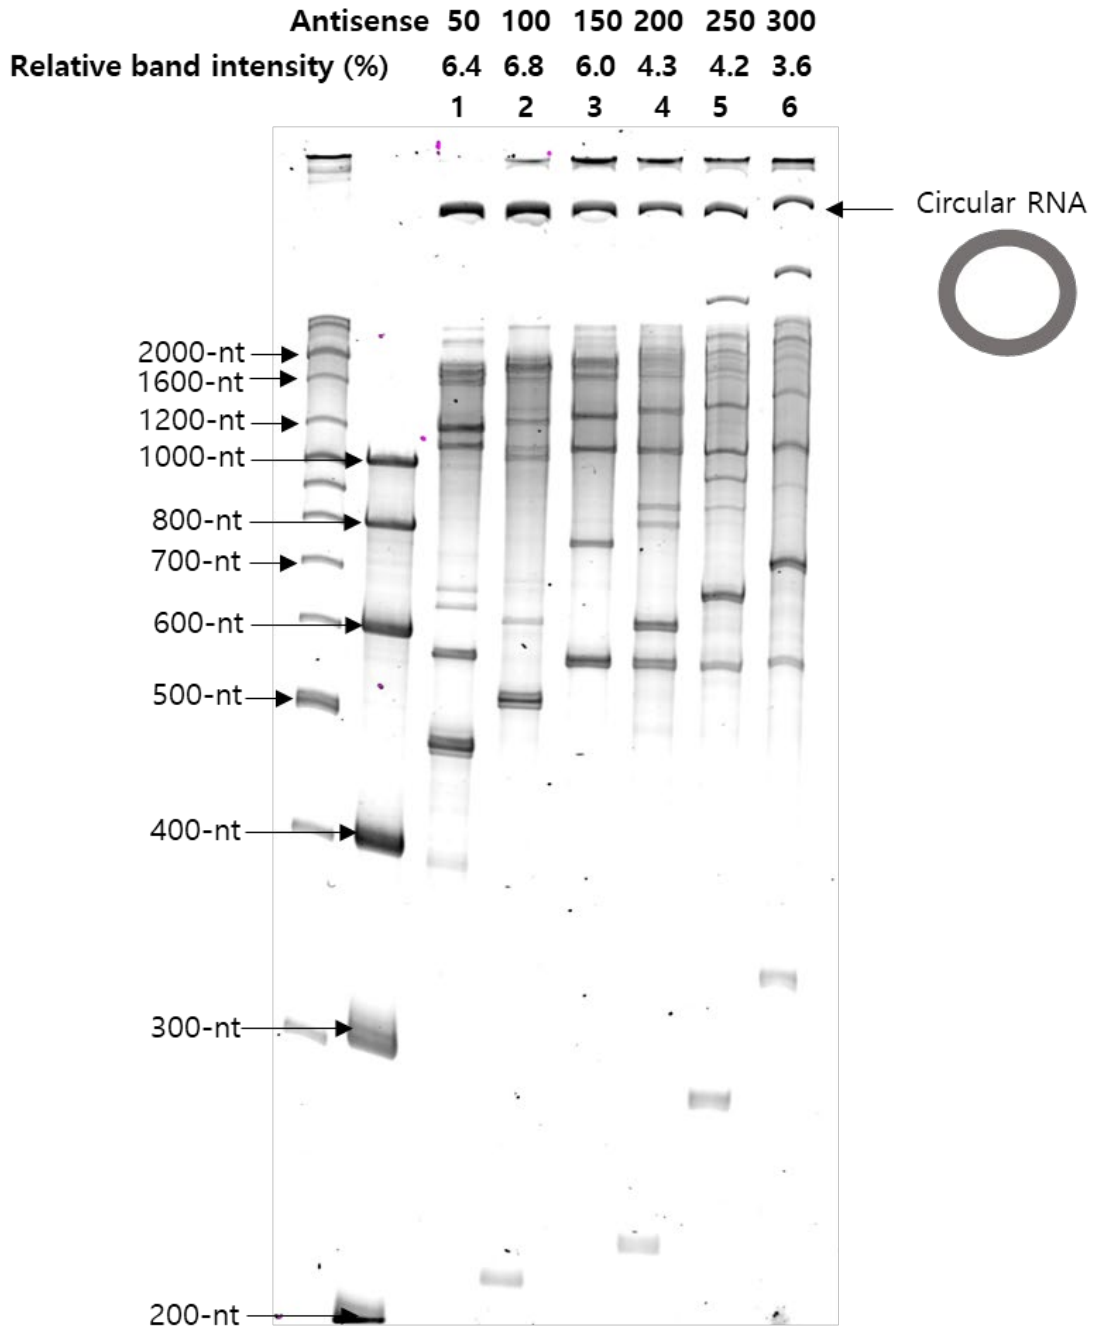

**Figure S1.** Results of 4% denatured PAGE analysis of IVT samples of self-circularization RNA construct (GOI: EMCV IRES-Gaussia Luciferase) with different sizes of antisense sequence and antisense binding sequence (lane 1: 50-nt, lane 2: 100-nt, lane 3: 150-nt, lane 4: 200-nt, lane 5: 250-nt, lane 6: 300-nt long antisense sequence and antisense binding sequence). Relative band intensity of circRNA is shown as a percentage of whole intensity of each lane.

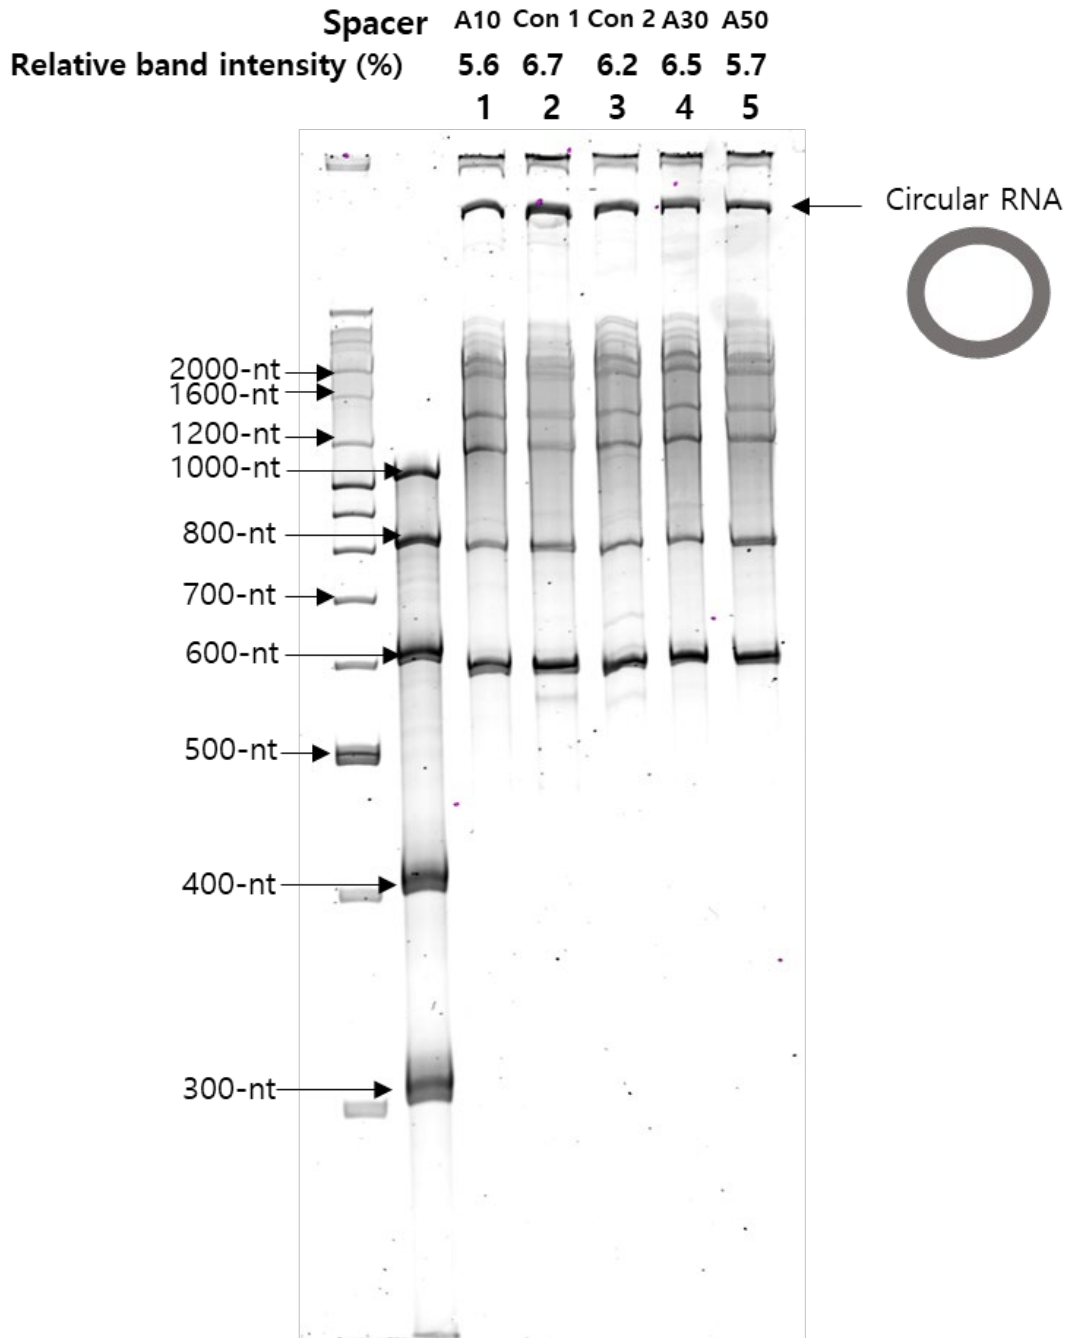

**Figure S2.** Results of 4% denatured PAGE analysis of IVT samples of self-circularization RNA construct (GOI: EMCV IRES-Gaussia Luciferase) with various spacers (linkers) between group I intron and IRES (lane 1: A10, lane 2: control 1, lane 3: control 2, lane 4: A30, lane 5: A50 spacer). Relative band intensity of circRNA is shown as a percentage of whole intensity of each lane.

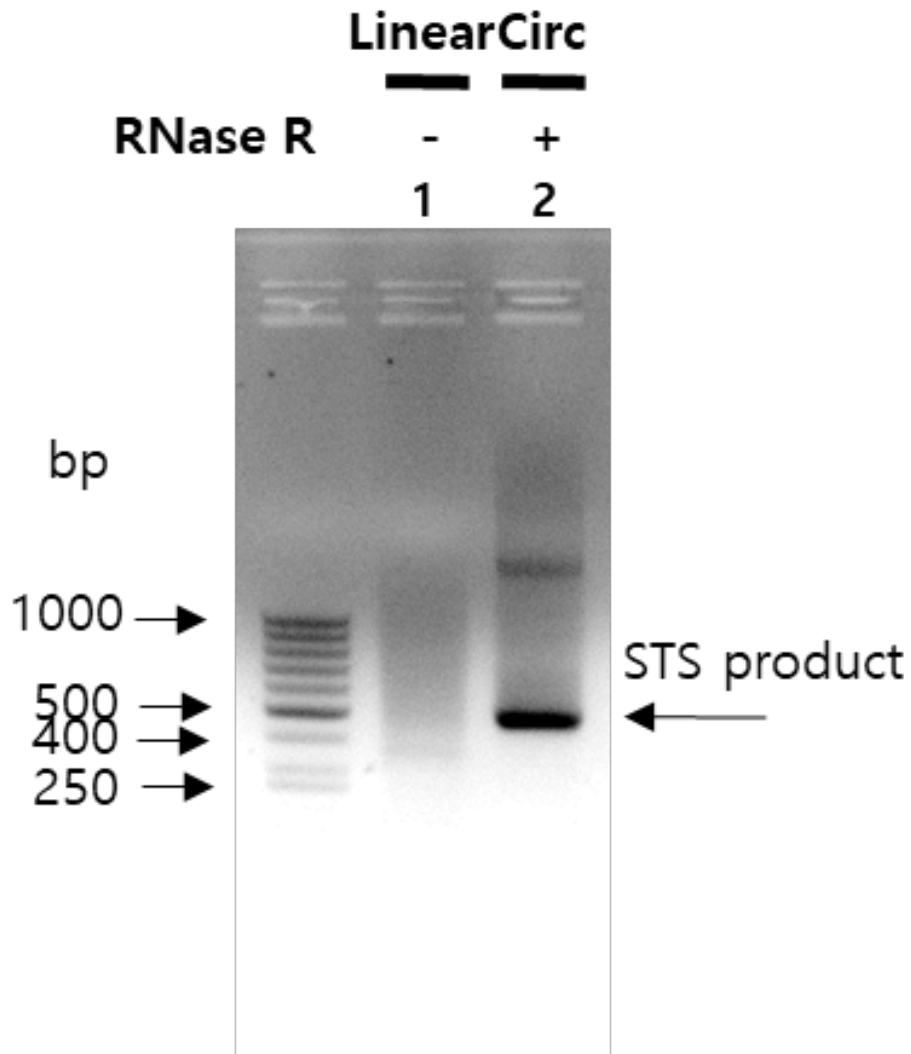

**Figure S3.** Results of 1.5% agarose gel analysis of RT-PCR products using STS primers listed in Table S3 for circRNA detection for control linear RNA without RNase R digestion (lane 1) and circular RNA IVT samples (P1 construct of Figure 3, GOI: EMCV IRES-Gaussia luciferase) with RNase R digestion (lane 2). Designed STS primers only amplify circular RNA. Arrow indicates the expected circRNA band.

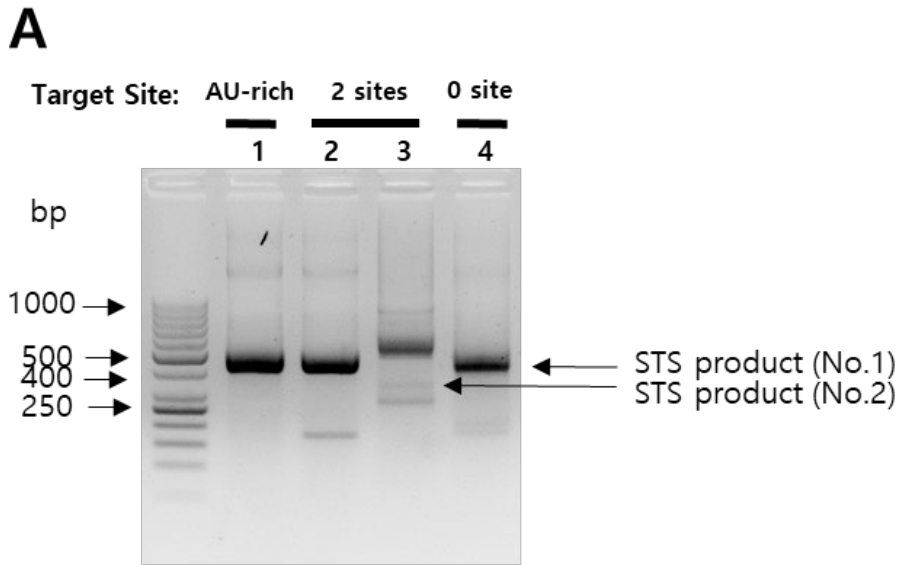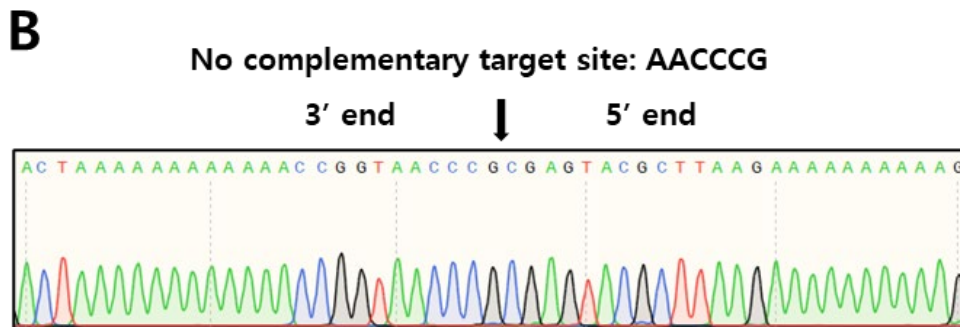

**Figure S4.** RT-PCR and sequencing analysis of selected P1 constructs of Figure 4 (GOI: EMCV IRES-Gaussia luciferase) with different target sequences. **(A)** Results of 2% agarose gel analysis of RT-PCR products using STS primers for circRNA detection (lane 1: AU-rich target site, lane 2: target No. 1 site present at 3' end of RNA construct with 2 target sites, lane 3: target No. 2 site present in the middle of GOI for RNA construct with 2 target sites, lane 4: no complementary target site). STS F and R primers were used for lane 1, 2, and 4. STS F2 and R was used for lane 3. Lane 2 and 3 are from same self-circularization RNA, but amplified by different primer sets. **(B)** Sequencing analysis of RT-PCR band from circRNA prepared by P1 construct without complementary target site. Ligation junction region is shown.

**A**

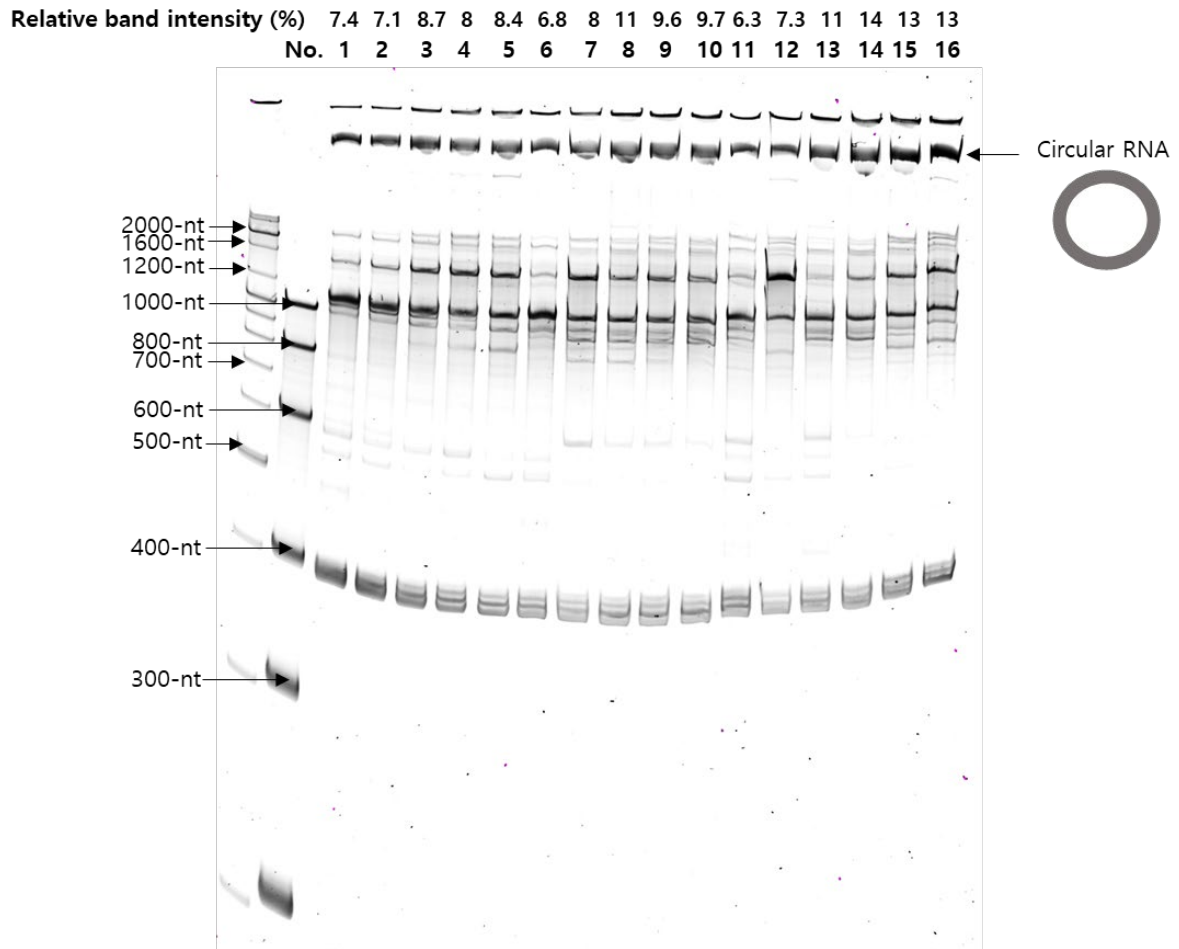

**Figure S5.** Results of 4% denatured PAGE analysis for IVT samples of self-circularization RNA P1 construct (GOI: EMCV IRES-Gaussia luciferase) with different AU-rich target sequences. (A) AU-rich No. 1 to 16 RNA constructs. Target sequence of each No. of AU-rich RNA construct is listed in Table S2. Relative band intensity of circRNA is shown as a percentage of whole intensity of each lane.

**B**

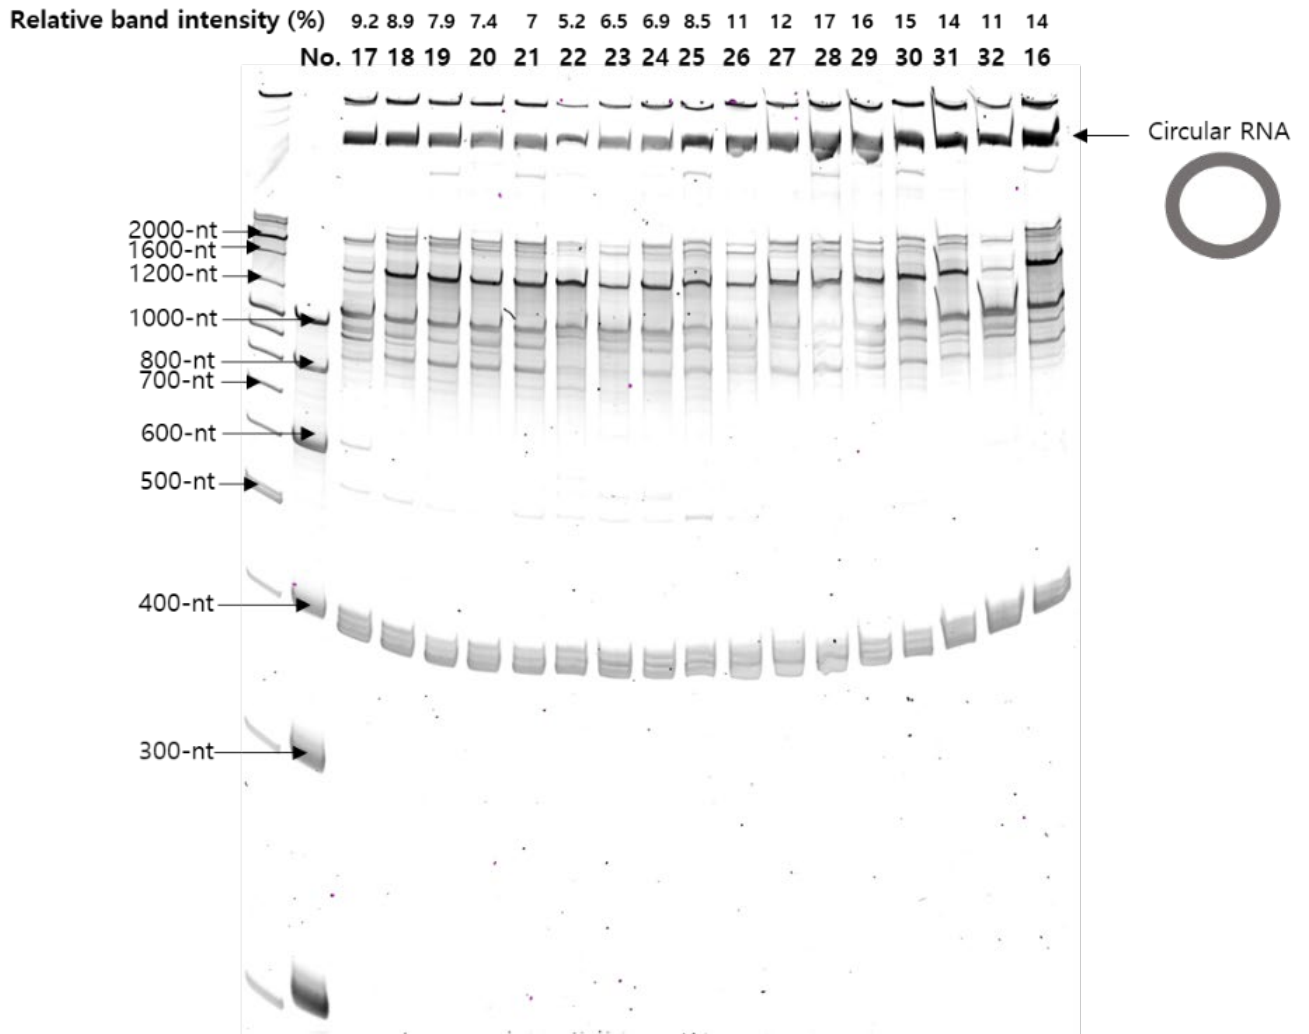

**Figure S5.** Results of 4% denatured PAGE analysis for IVT samples of self-circularization RNA P1 construct (GOI: EMCV IRES-Gaussia luciferase) with different AU-rich target sequences. **(B)** AU-rich No. 17 to 32 and AU-rich No. 16 RNA constructs. Target sequence of each No. of AU-rich RNA construct is listed in Table S2. Relative band intensity of circRNA is shown as a percentage of whole intensity of each lane.

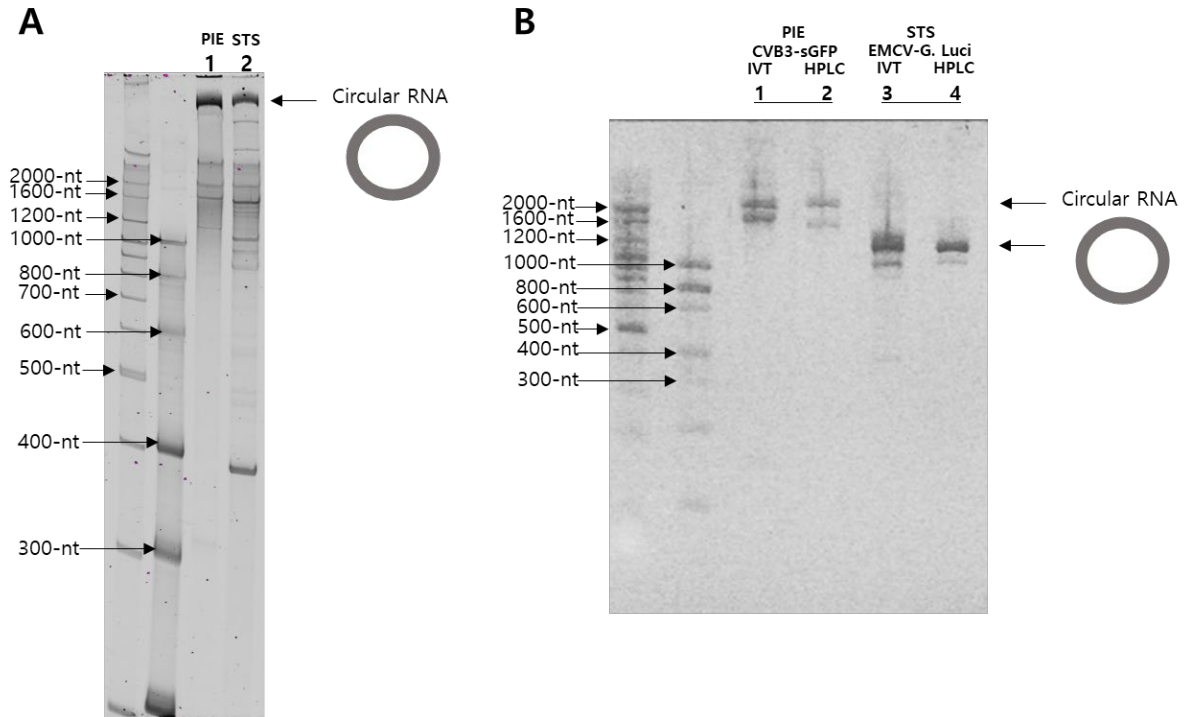

**Figure S6.** Comparison of circularization efficacy between PIE and end-to-end STS reaction. **(A)** Results of 4% denatured PAGE analysis for IVT samples of PIE construct (lane 1) and end-to-end STS P1 RNA construct (GOI: CVB3 IRES-sGFP) (lane 2). **(B)** Result of 2% E-gel electrophoresis using Ex 1% - 2% program for IVT samples of PIE construct (GOI: CVB3 IRES-sGFP) and end-to-end STS P1 RNA construct (GOI: EMCV IRES-Gaussia luciferase). (lane 1: PIE, lane 2: HPLC-purified PIE circRNA, lane 3: STS, lane 4: HPLC-purified STS circRNA).



**A**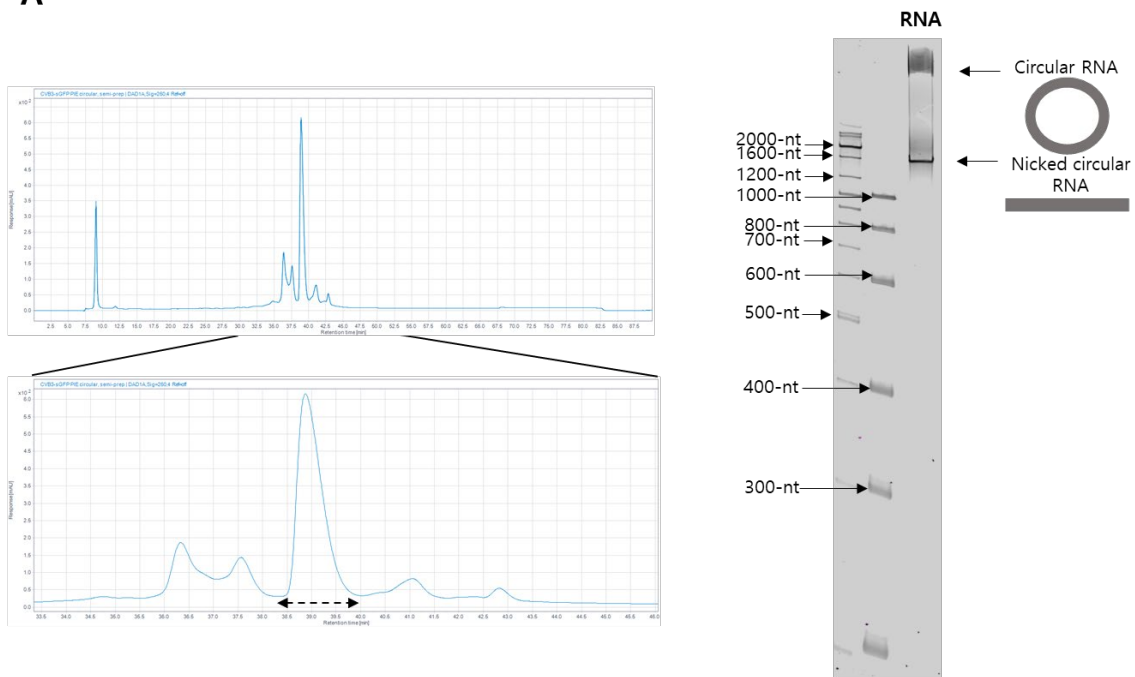**B**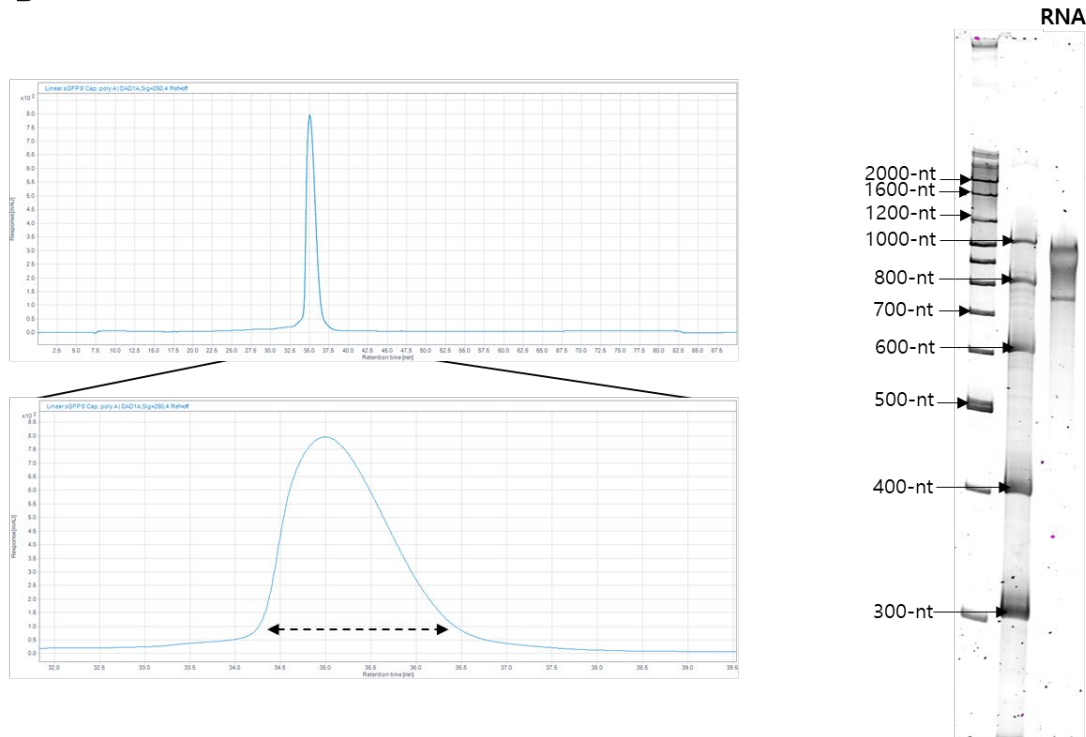

**Figure S7.** IP-RP HPLC purification of circRNA prepared by PIE or control linear RNA. **(A)** HPLC chromatogram (left) of IVT sample prepared by PIE (GOI: CVB3 IRES-sGFP) and 4% denatured PAGE analysis of the purified circRNA (right). **(B)** HPLC chromatogram of linear m<sup>1</sup>ψ-modified sGFP with 5' cap and 3' polyA (left) and 4% denatured PAGE analysis of the purified linear RNA (right). Eluted region is indicated by a double-headed arrow.

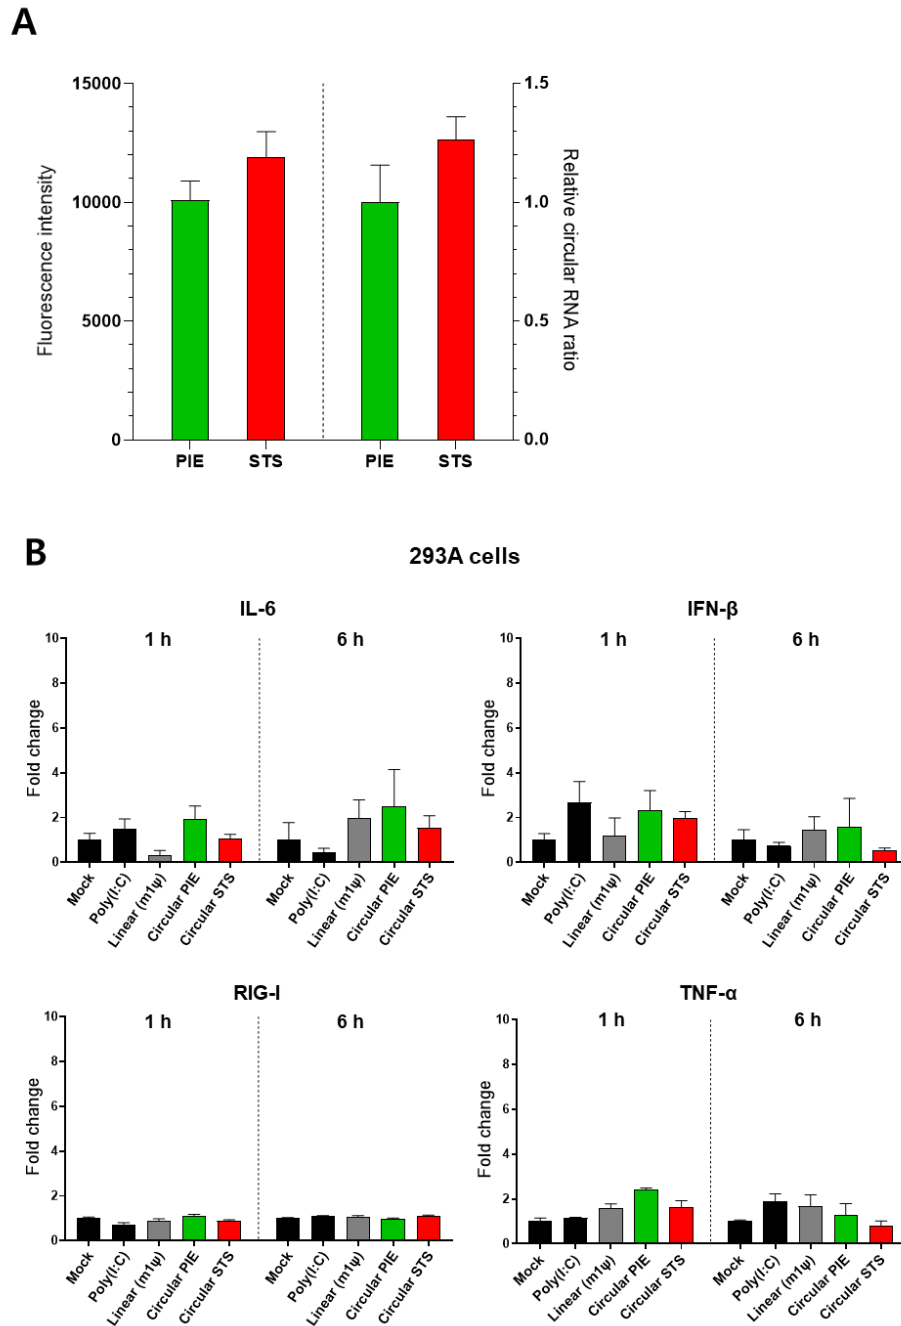

**Figure S8.** Correlations of protein expression with circRNA quantity and innate immunity induced by circRNA in HEK293A cells. (A) Fluorescence intensities of cells (left) and relative quantities of intracellular circRNAs by qRT-PCR using STS primers (right) at 24 h after transfection with equimolar amounts of circRNAs (GOI: CVB3 IRES-sGFP) generated through PIE or end-to-end STS reaction. (B) qRT-PCR analysis using specific primers for innate immunity markers with RNAs extracted from transfected HEK293A cells. Poly(I:C) and linear RNA with m1ψ-modified base were used as controls. RNA levels were indicated relative to those in mock-transfected cells. Data are presented as mean ± SEM (n = 3).

**Table S1.** Sequences of spacers (linkers) between *Tetrahymena* group I intron and IRES.

| <b>Spacer (linker)</b> | <b>Sequences (5' to 3')</b>                              |
|------------------------|----------------------------------------------------------|
| <b>A10</b>             | AAAAAAAAAA                                               |
| <b>A30</b>             | AAAAAAAAAAAAAAAAAAAAAAAAAAAAAAAA                         |
| <b>A50</b>             | AAAAAAAAAAAAAAAAAAAAAAAAAAAAAAAAAAAAAAAAAAAAAAAAAAAAAAAA |
| <b>Control 1</b>       | GGUAGUGGUGCUACUAACUUCAGCCUGCUGAAGCA                      |
| <b>Control 2</b>       | GGUAGUAAACUACUAACUACAACCUGCUGAAGCA                       |

**Table S2.** A total of 32 AU-rich target site sequences (No. 1 – No. 32). No. 17 and 18 target sites exist in ribozyme sequences.

| No. | A5 or A4U1                                                       | U5 or U4A1                       |
|-----|------------------------------------------------------------------|----------------------------------|
| 1:  | ---- <b>AAAAAU</b> -3' -end                                      | 7: ---- <b>UUUUUU</b> -3' -end   |
| 2:  | ---- <b>UAAAAU</b> -3' -end                                      | 8: ---- <b>AUUUUU</b> -3' -end   |
| 3:  | ---- <b>AUAAAAU</b> -3' -end                                     | 9: ---- <b>UAUUUU</b> -3' -end   |
| 4:  | ---- <b>AAUAAU</b> -3' -end                                      | 10: ---- <b>UUAUUU</b> -3' -end  |
| 5:  | ---- <b>AAAUAU</b> -3' -end                                      | 11: ---- <b>UUUAUU</b> -3' -end  |
| 6:  | ---- <b>AAAAUU</b> -3' -end                                      | 12: ---- <b>UUUUAU</b> -3' -end  |
|     | A2U3                                                             | U2A3                             |
| 13: | ---- <b>AAUUUU</b> -3' -end                                      | 23: ---- <b>UUAAAU</b> -3' -end  |
| 14: | ---- <b>AUAUUU</b> -3' -end                                      | 24: ---- <b>UAUAAU</b> -3' -end  |
| 15: | ---- <b>AUUAAU</b> -3' -end                                      | 25: ---- <b>UAAUAU</b> -3' -end  |
| 16: | ---- <b>AUUUAU</b> -3' -end                                      | 26: ---- <b>UAAAUU</b> -3' -end  |
| 17: | ---- <b><u>UAAUUU</u></b> -3' -end<br><small>In ribozyme</small> | 27: ---- <b>AUUAAU</b> -3' -end  |
| 18: | ---- <b><u>UAUAUU</u></b> -3' -end<br><small>In ribozyme</small> | 28: ---- <b>AUAUAU</b> -3' -end  |
| 19: | ---- <b>UAUUAAU</b> -3' -end                                     | 29: ---- <b>AUAAUU</b> -3' -end  |
| 20: | ---- <b>UUAAAU</b> -3' -end                                      | 30: ---- <b>AAUUAAU</b> -3' -end |
| 21: | ---- <b>UUAUAU</b> -3' -end                                      | 31: ---- <b>AAUAUU</b> -3' -end  |
| 22: | ---- <b>UUUAAU</b> -3' -end                                      | 32: ---- <b>AAAUUU</b> -3' -end  |

**Table S3.** PCR primers used in experiments.

| <b>Primers</b>                                                     | <b>Sequences (5' to 3')</b>                                  |
|--------------------------------------------------------------------|--------------------------------------------------------------|
| <i>For DNA construct of circular RNA and RT-PCR of STS product</i> |                                                              |
| <b>T7 F for DNA template</b>                                       | GGGATTCGAACATCGATTAATACGACTCACTATAGGGGCATCGAT<br>TGAATTGTCGA |
| <b>T7 R for DNA template</b>                                       | AGATCTCTCGAGCAGCGCTGCTCGAGGCAAGCTT                           |
| <b>T7 F for P1&amp;P10 DNA template</b>                            | ATAATACGACTCACTATAGGGCGTACTCCGCCCAAAAAAGTTATC<br>A           |
| <b>T7 R for P1&amp;P10 DNA template</b>                            | CCCACCCAAACCGGTTTTTTTTTTTTTTAGTCAC                           |
| <b>T7 F for P1 DNA template</b>                                    | ATAATACGACTCACTATAGGGGNNNNNAAAAGTTATCAGGCATG<br>CACCTGGT     |
| <b>T7 R for P1 DNA template</b>                                    | ANNNNNACCGGTTTTTTTTTTTTTTAGTCACCACCG                         |
| <b>STS F (GOI: EMCV-G. Luci)</b>                                   | CAAGGACTTGGAGCCCATGGAGCAG                                    |
| <b>STS F2 (GOI: EMCV-G. Luci)</b>                                  | ATGGGAGTCAAAGTTCTGTTTGCCCTGA                                 |
| <b>STS R (GOI: EMCV-G. Luci)</b>                                   | TGTGCCGCCTTGCAGGTGTATC                                       |
| <b>STS F (GOI: CVB3-sGFP)</b>                                      | AGGATGGCAGCGTGCAGCTGGCTGA                                    |
| <b>STS R (GOI: CVB3-sGFP)</b>                                      | GTCCGGGGTAACAGAAGTGCTTGAT                                    |
| <i>For qRT-PCR of inflammatory cytokine genes</i>                  |                                                              |
| <b>18S F</b>                                                       | CTTAGAGGGACAAGTGGCG                                          |
| <b>18S R</b>                                                       | ACGCTGAGCCAGTCAGTGTA                                         |
| <b>TNF<math>\alpha</math> F</b>                                    | TCCCCAGGGACCTCTCTCTA                                         |
| <b>TNF<math>\alpha</math> R</b>                                    | AGGGTTTGCTACAACATGGGC                                        |
| <b>IL6 F</b>                                                       | AGCCACTCACCTCTTCAGAAC                                        |
| <b>IL6 R</b>                                                       | GCCTCTTTGCTGCTTTCACAC                                        |
| <b>RIG-I F</b>                                                     | TGTGGGCAA TGTCA TCAAAA                                       |
| <b>RIG-I R</b>                                                     | GAAGCACTTGCTACCTCTTGC                                        |
| <b>IFN<math>\beta</math> F</b>                                     | TCTAGCACTGGCTGGAATGAG                                        |
| <b>IFN<math>\beta</math> R</b>                                     | GTTTCGGAGGTAACCTGTAAG                                        |
